# Supplementary material for: Origin and evolution of the major histocompatibility complex class I region in eutherian mammals
Source: PubMed Central journal article supplement (PMC6636196; doi:10.1002/ece3.5373), 2019-06-14

Supporting Information for

# **Origin and evolution of the MHC class I region in eutherian mammals**

Shamshidin Abduriyim, Da-Hu Zou, and Huabin Zhao\*

Department of Ecology, Hubei Key Laboratory of Cell Homeostasis, College of Life  
Science, Wuhan University, Wuhan 430072, China

\***Corresponding author:** Huabin Zhao (Email: huabinzhao@whu.edu.cn)

**This supporting file includes:**

Tables S1-S2

Figures S1-S3

**Supplementary Table S1. Genome assembly information for nine species investigated in this study.**

| <b>Suborder/Order</b> | <b>Family</b>   | <b>Species</b>                 | <b>Assembly</b> | <b>Contig N50<br/>(bp)</b> | <b>Sequencing<br/>platform</b> | <b>Coverage</b> | <b>Genebank accession</b> |
|-----------------------|-----------------|--------------------------------|-----------------|----------------------------|--------------------------------|-----------------|---------------------------|
| Yangochiroptera       | Phyllostomidae  | <i>Desmodus rotundus</i>       | ASM294091v2     | 80250                      | Illumina HiSeq                 | 94x             | PEHR00000000              |
|                       | Miniopteridae   | <i>Miniopterus natalensis</i>  | Mnat.v1         | 29777                      | Illumina HiSeq                 | 77.0x           | LDJU00000000              |
| Yinpterochiroptera    | Rhinolophoidae  | <i>Hipposideros armiger</i>    | ASM189008v1     | 39863                      | Illumina HiSeq                 | 218.6x          | JXIK00000000              |
|                       |                 | <i>Rhinolophus sinicus</i>     | ASM188883v1     | 37803                      | Illumina HiSeq                 | 146.44x         | LVEH00000000              |
| Artiodactyla          | Delphinidae     | <i>Orcinus orca</i>            | Oorc_1.1        | 70300                      | Illumina HiSeq                 | 200.0x          | ANOL00000000              |
| Pholidota             | Manidae         | <i>Manis javanica</i>          | ManJan1.0       | 38922                      | Illumina HiSeq                 | 60.0x           | JSZB00000000              |
| Pilosa                | Myrmecophagidae | <i>Myrmecophaga tridactyla</i> | MyrTri_v1_BIUU  | 36434                      | Illumina HiSeq                 | 28.9x           | PVIY00000000              |
| Afrosoricida          | Tenrecidae      | <i>Echinops telfairi</i>       | EchTel2.0       | 20428                      | Illumina HiSeq                 | 78x             | AAIY00000000              |
| Proboscidea           | Elephantidae    | <i>Loxodonta africana</i>      | Loxafr3.0       | 69023                      | Sanger; ABI.                   | 7x              | AAGU00000000              |

**Supplementary Table S2. Recombinant sequences and their parent sequences detected in this study.**

| Species | Breakpoint Positions |      | Recombinant <sup>^</sup> | Minor Parent Sequence | Major Parent Sequence | Detection Methods ( <i>P</i> values) |           |          |        |         |         |       |       |
|---------|----------------------|------|--------------------------|-----------------------|-----------------------|--------------------------------------|-----------|----------|--------|---------|---------|-------|-------|
|         | Begin                | End  |                          |                       |                       | RD P                                 | GENECO NV | Bootscan | Maxchi | Chimera | SiSscan | LARD  | 3Seq  |
| Dero    | 333                  | 498  | Dero_G25                 | Unknown (Dero_G1)     | Dero_G6               | 0.003                                | 0.026     | NS       | 0.000  | 0.000   | 0.003   | NS    | 0.000 |
|         | 551*                 | 732  | Dero_G19                 | Dero_G25              | Dero_G1               | 0.000                                | 0.013     | 0.014    | 0.000  | 0.000   | 0.000   | 0.000 | 0.000 |
|         | 1*                   | 76   | Dero_G9_ps               | Unknown (Dero_G20)    | Dero_G5               | 0.000                                | NS        | 0.000    | 0.000  | 0.000   | 0.000   | NS    | 0.000 |
|         | 553                  | 825  | Dero_G20                 | Dero_G7               | Dero_G1               | 0.000                                | 0.000     | 0.000    | 0.000  | 0.000   | 0.000   | 0.000 | 0.000 |
| Roae    | 1*                   | 314  | Roae_G40_ps              | Unknown (Roae_G13)    | Roae_G26              | 0.019                                | 0.050     | NS       | 0.000  | NS      | 0.000   | 0.000 | 0.014 |
|         | 9*                   | 301  | Roae_G20                 | Roae_G6_ps            | Roae_G27_ps           | 0.030                                | NS        | 0.015    | 0.000  | 0.004   | 0.000   | 0.000 | NS    |
|         | 238                  | 430  | Roae_G18#                | Roae_G36_ps           | Roae_G27_ps           | NS                                   | NS        | NS       | 0.000  | 0.017   | 0.000   | 0.000 | NS    |
|         | 722                  | 881  | Roae_G36#                | Roae_G1               | Roae_G39              | NS                                   | 0.000     | 0.000    | 0.003  | 0.017   | 0.000   | NS    | 0.005 |
| Ptal    | 9*                   | 310  | Ptal_02#                 | Ptal_05               | Unknown (Ptal_04)     | 0.000                                | 0.006     | 0.001    | 0.000  | 0.000   | 0.000   | 0.000 | 0.000 |
|         | 450                  | 934* | Ptal_0101#               | Ptal_03               | KP862828_ptal_0102    | 0.049                                | NS        | 0.032    | 0.000  | 0.000   | 0.000   | 0.000 | NS    |
|         | 461*                 | 564  | Ptal_02#                 | Ptal_0102             | Unknown               | 0.000                                | NS        | 0.017    | 0.041  | 0.013   | 0.002   | 0.000 | 0.000 |

|              |     |      |                  |                            |             |           |       |       |       |       |       |           |           |
|--------------|-----|------|------------------|----------------------------|-------------|-----------|-------|-------|-------|-------|-------|-----------|-----------|
|              |     |      |                  | (Ptal_04)                  |             | 05        |       |       |       |       |       | 0         | 02        |
| Mina         | 272 | 379  | Mina_G37<br>#    | Mina_G34                   | Mina_G15    | 0.0<br>00 | 0.000 | 0.000 | 0.000 | 0.000 | 0.000 | 0.00<br>0 | 0.0<br>00 |
|              | 388 | 545  | Mina_G28<br>#    | Unknown<br>(Mina_G15)      | Mina_G34    | 0.0<br>06 | 0.003 | NS    | 0.000 | 0.001 | 0.000 | NS        | 0.0<br>03 |
|              | 38* | 207  | Mina_G28<br>#    | Mina_G15                   | Mina_G34    | NS        | NS    | 0.005 | 0.001 | 0.001 | 0.000 | 0.01<br>2 | 0.0<br>00 |
| Hiar         | 270 | 498  | Hiar_G21#        | Hiar_G34                   | Hiar_G1     | 0.0<br>01 | 0.005 | 0.000 | 0.000 | 0.029 | 0.000 | 0.00<br>0 | 0.0<br>00 |
|              | 243 | 820* | Hiar_G49_<br>pr  | Unknown<br>(Hiar_G15_ps)   | Hiar_G91    | NS        | NS    | NS    | 0.000 | 0.000 | 0.006 | 0.00<br>0 | NS        |
|              | 68* | 211  | Hiar_G8_p<br>r   | Hiar_G28_pr                | Hiar_G91    | 0.0<br>01 | NS    | 0.000 | 0.000 | 0.000 | 0.000 | NS        | 0.0<br>00 |
|              | 1*  | 234  | Hiar_G91#        | Unknown (Hiar_G1)          | Hiar_G15_ps | NS        | NS    | NS    | 0.002 | 0.001 | NS    | 0.01<br>4 | 0.0<br>34 |
|              | 339 | 555  | Hiar_G27_<br>ps# | Unknown<br>(Hiar_G28)      | Hiar_G15_ps | NS        | 0.001 | NS    | 0.049 | NS    | 0.000 | 0.00<br>2 | NS        |
| Pango<br>lin | 1*  | 282  | Manjav_G<br>14#  | Unknown<br>(Manjav_G15_ps) | Manjav_G2   | 0.0<br>00 | 0.003 | 0.012 | 0.008 | 0.000 | 0.000 | 0.00<br>0 | 0.0<br>00 |
|              | 462 | 498  | Manjav_G<br>5#   | Manjav_G15_ps              | Manjav_G2   | 0.0<br>02 | NS    | 0.010 | 0.032 | 0.006 | 0.000 | 0.00<br>0 | 0.0<br>20 |
| Dog          | 452 | 570  | DLA-64#          | Unknown (DLA-79)           | DLA-12      | 0.0<br>01 | 0.000 | 0.000 | 0.000 | 0.000 | 0.000 | 0.00<br>0 | 0.0<br>00 |
| Horse        | 96* | 246  | Eqca-N           | Eqca-16                    | EQMHCB1     | 0.0<br>00 | 0.030 | 0.001 | 0.000 | 0.000 | 0.005 | 0.00<br>2 | NS        |
|              | 30* | 214  | EQMHCB           | Unknown                    | EQMHCB1     | NS        | 0.020 | NS    | 0.000 | 0.012 | 0.011 | 0.00      | 0.0       |

|          |      |      |              |                    |                    |       |       |       |       |       |       |       |       |
|----------|------|------|--------------|--------------------|--------------------|-------|-------|-------|-------|-------|-------|-------|-------|
|          |      | 2    | (EQMHCX1)    |                    |                    |       |       |       |       |       |       | 1     | 03    |
|          | 13*  | 214  | Eqca-16#     | EQMHCX1            | Eqca-1             | NS    | 0.036 | NS    | 0.024 | 0.048 | NS    | NS    | 0.031 |
| Pig      | 508  | 710* | SLA-3#       | Unknown (SLA-8)    | SLA-7              | 0.004 | NS    | 0.000 | 0.006 | 0.003 | 0.000 | 0.000 | 0.025 |
|          | 316  | 473  | SLA-6#       | SLA-7              | Unknown (SLA-8)    | 0.024 | NS    | 0.012 | 0.044 | 0.024 | 0.017 | 0.000 | NS    |
| Macaque  | 546  | 892* | Mamu-B7      | Mamu-B13           | Mamu-AG1           | NS    | NS    | 0.029 | 0.000 | 0.000 | 0.000 | 0.044 | NS    |
|          | 32*  | 84   | Mamu-B12#    | Unknown (Mamu-E)   | Mamu-B15           | 0.003 | 0.010 | 0.002 | NS    | 0.025 | 0.000 | NS    | 0.036 |
| Elephant | 9*   | 337  | Loaf_G82_ps  | Loaf_G50           | Unknown (Loaf_G53) | 0.035 | 0.044 | 0.026 | 0.000 | 0.000 | 0.001 | 0.000 | 0.000 |
|          | 141* | 317  | Loaf_G53#    | Unknown (Loaf_G51) | Loaf_G50           | 0.006 | NS    | 0.012 | 0.040 | 0.016 | NS    | NS    | 0.003 |
|          | 26*  | 313  | Loaf_G70_ps# | Loaf_G5            | Loaf_G11           | 0.003 | 0.000 | 0.000 | 0.000 | 0.019 | 0.002 | NS    | 0.000 |
|          | 469  | 932* | Loaf_G5      | Loaf_G18           | Loaf_G51           | 0.027 | NS    | NS    | 0.024 | 0.000 | 0.000 | NS    | NS    |
|          | 133  | 245  | Loaf_G39_ps  | Loaf_G33_ps        | Loaf_G11           | 0.005 | NS    | 0.004 | 0.004 | 0.026 | NS    | NS    | 0.006 |
|          | 1*   | 360  | Loaf_G33_ps  | Unknown (Loaf_G31) | Loaf_G51           | NS    | 0.028 | NS    | NS    | 0.022 | 0.000 | 0.026 | 0.000 |
|          | 17*  | 198  | Loaf_G25_ps# | Loaf_G50           | Unknown (Loaf_G11) | 0.007 | NS    | NS    | 0.009 | 0.020 | NS    | NS    | 0.048 |
|          | 9*   | 309* | Loaf_G11#    | Unknown            | Loaf_G50           | 0.0   | NS    | 0.022 | 0.002 | 0.000 | 0.000 | 0.000 | NS    |

|        |     |      |                 |                          |            |             |    |    |       |       |       |         |       |
|--------|-----|------|-----------------|--------------------------|------------|-------------|----|----|-------|-------|-------|---------|-------|
| Tenrec | 28* | 160  | Echtel_G5<br>9# | (Loaf_G51)<br>Echtel_G38 | Echtel_G5  | 45<br>0.000 |    |    |       |       |       | 9<br>NS | 0.000 |
|        | 802 | 944* | Echtel_G5<br>#  | Echtel_G38               | Echtel_G59 | 0.036       | NS | NS | 0.000 | 0.002 | 0.000 | NS      | 0.000 |
|        | 204 | 493  | Echtel_G3<br>6# | Unknown<br>(Echtel_G59)  | Echtel_G38 | 0.040       | NS | NS | 0.002 | 0.001 | 0.000 | NS      | 0.006 |

**Note-** Minor Parent: Parent contributing the smaller fraction of sequence. Major Parent: Parent contributing the largest fraction of sequence. Unknown: Only one parent and a recombinant need be in the alignment for recombination event to be detectable. The sequence listed as unknown was used to infer the existence of a missing parental sequence. NS: Not significant. \* The breakpoint position was most likely overprinted by a subsequent recombination event. # It is possible that this apparent recombination signal could have been caused by an evolutionary process other than recombination. ^ One of the identified parents might be the recombinant in some events.

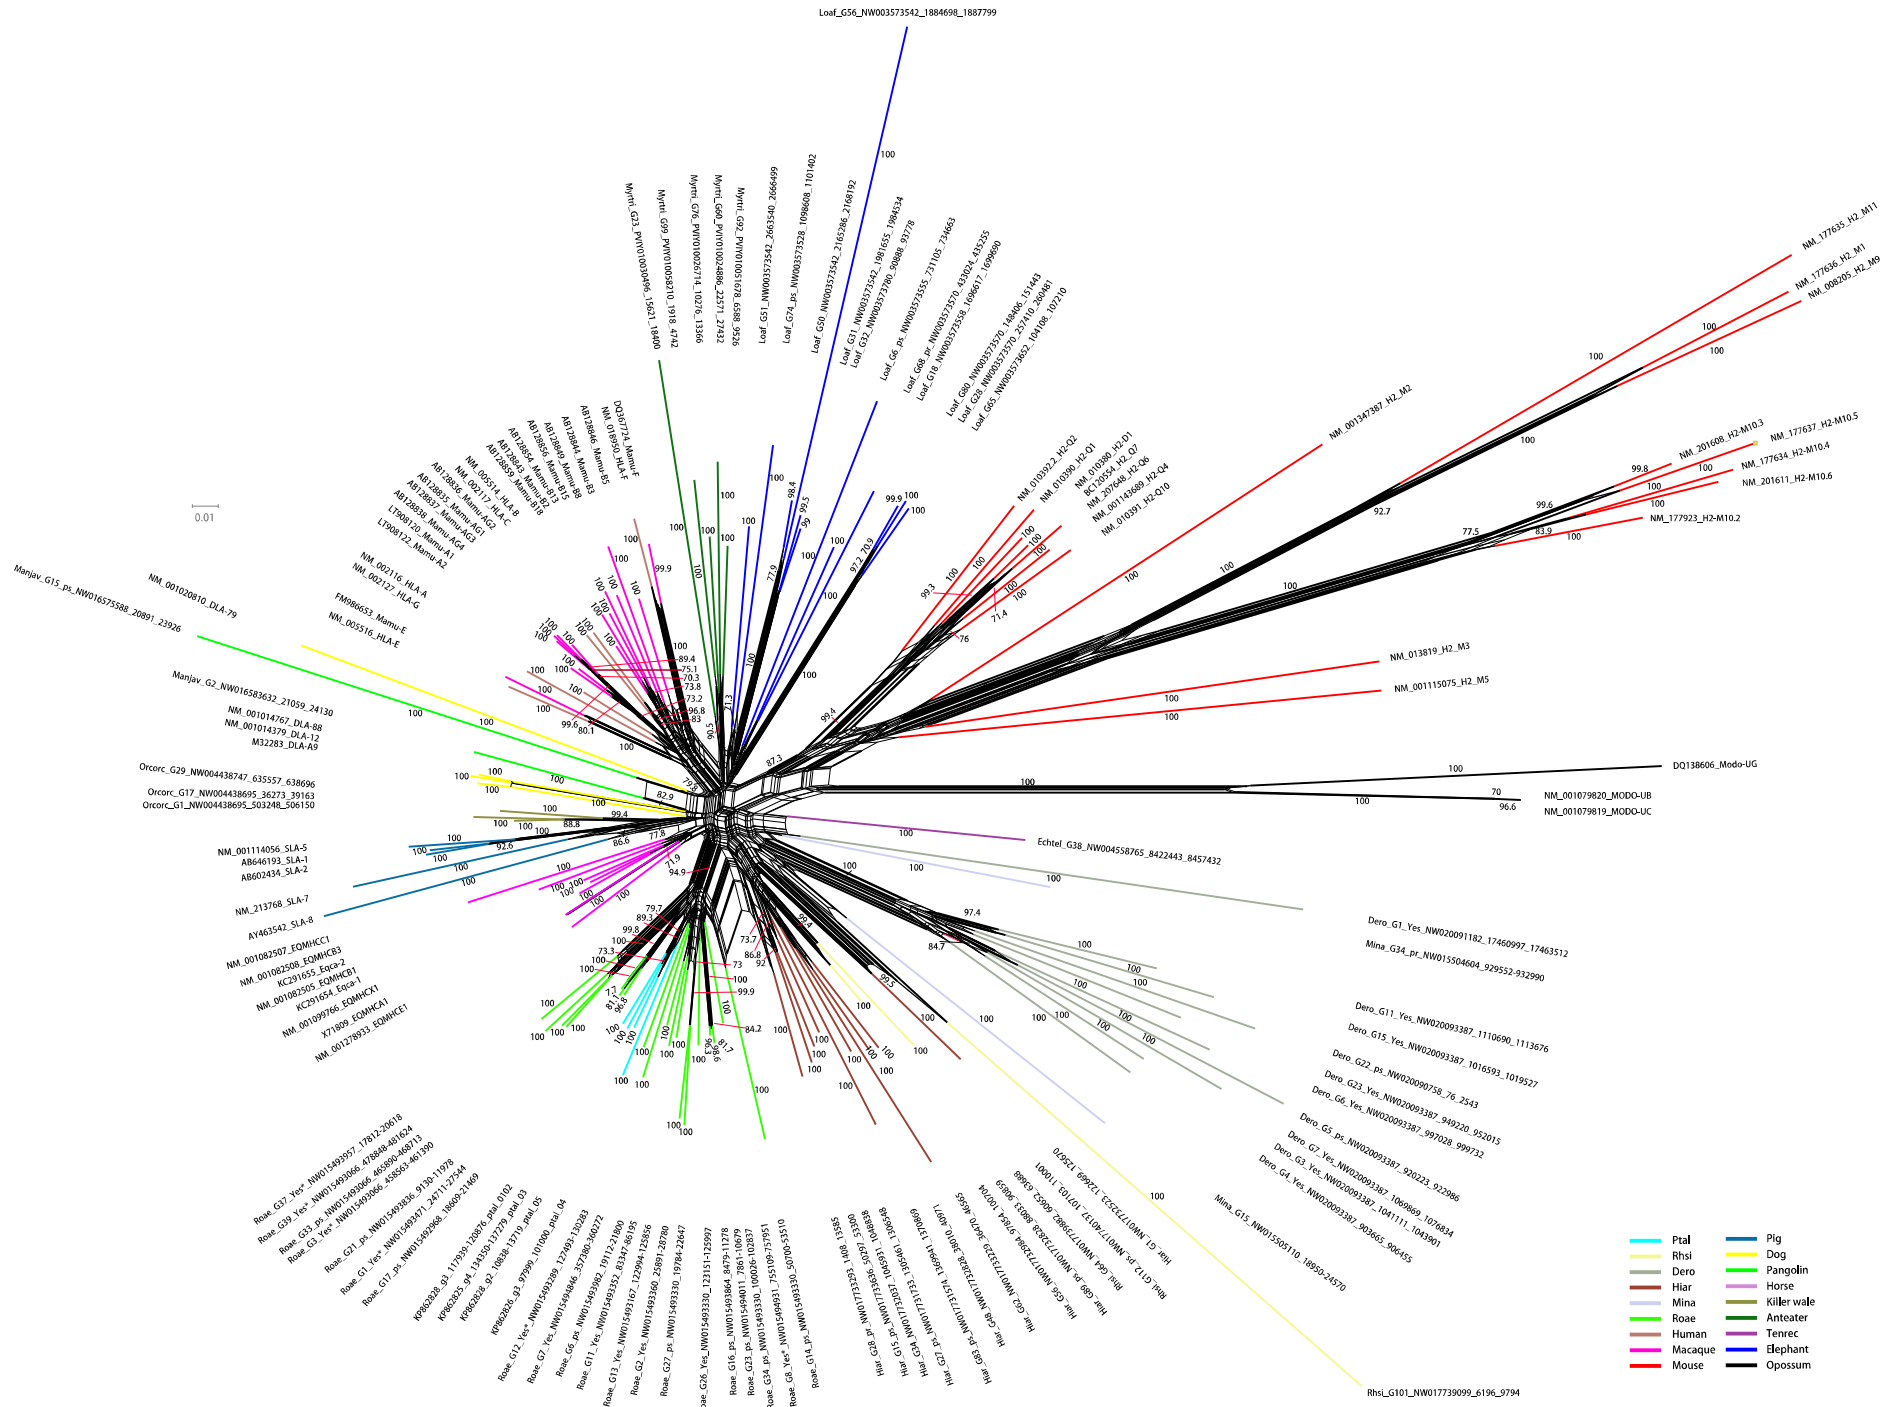

Supplementary Figure 1. NeighborNet network showing inferred phylogenetic relationships among MHC class I sequences of eutherian mammals, based on a segment from MHC I exons 2 to 5. Numerals are bootstrap support values for each edge, with only values >70% shown. Edges with high support are thickened. Different colors indicate different species, as defined in the key at lower right. Abbreviations: Ptal, *P. alecto* (black flying fox); Rhsi, *R. sinicus* (Chinese horseshoe bat); Dero, *D. rotundus* (common vampire bat); Hiar, *H. armiger* (great roundleaf bat); Mina, *M. natalensis* (natal long-fingered bat); Roae, *R. aegyptiacus* (Egyptian rousette bat). The sequence names and accession numbers at the tips of branches: GeneBank accession numbers followed by gene names were given for the sequences obtained from NCBI; gene name before the scaffold accession number, start and end positions was shown for sequences derived from genomes in this study.

Supplementary Figure 2

*Desmodus rotundus*

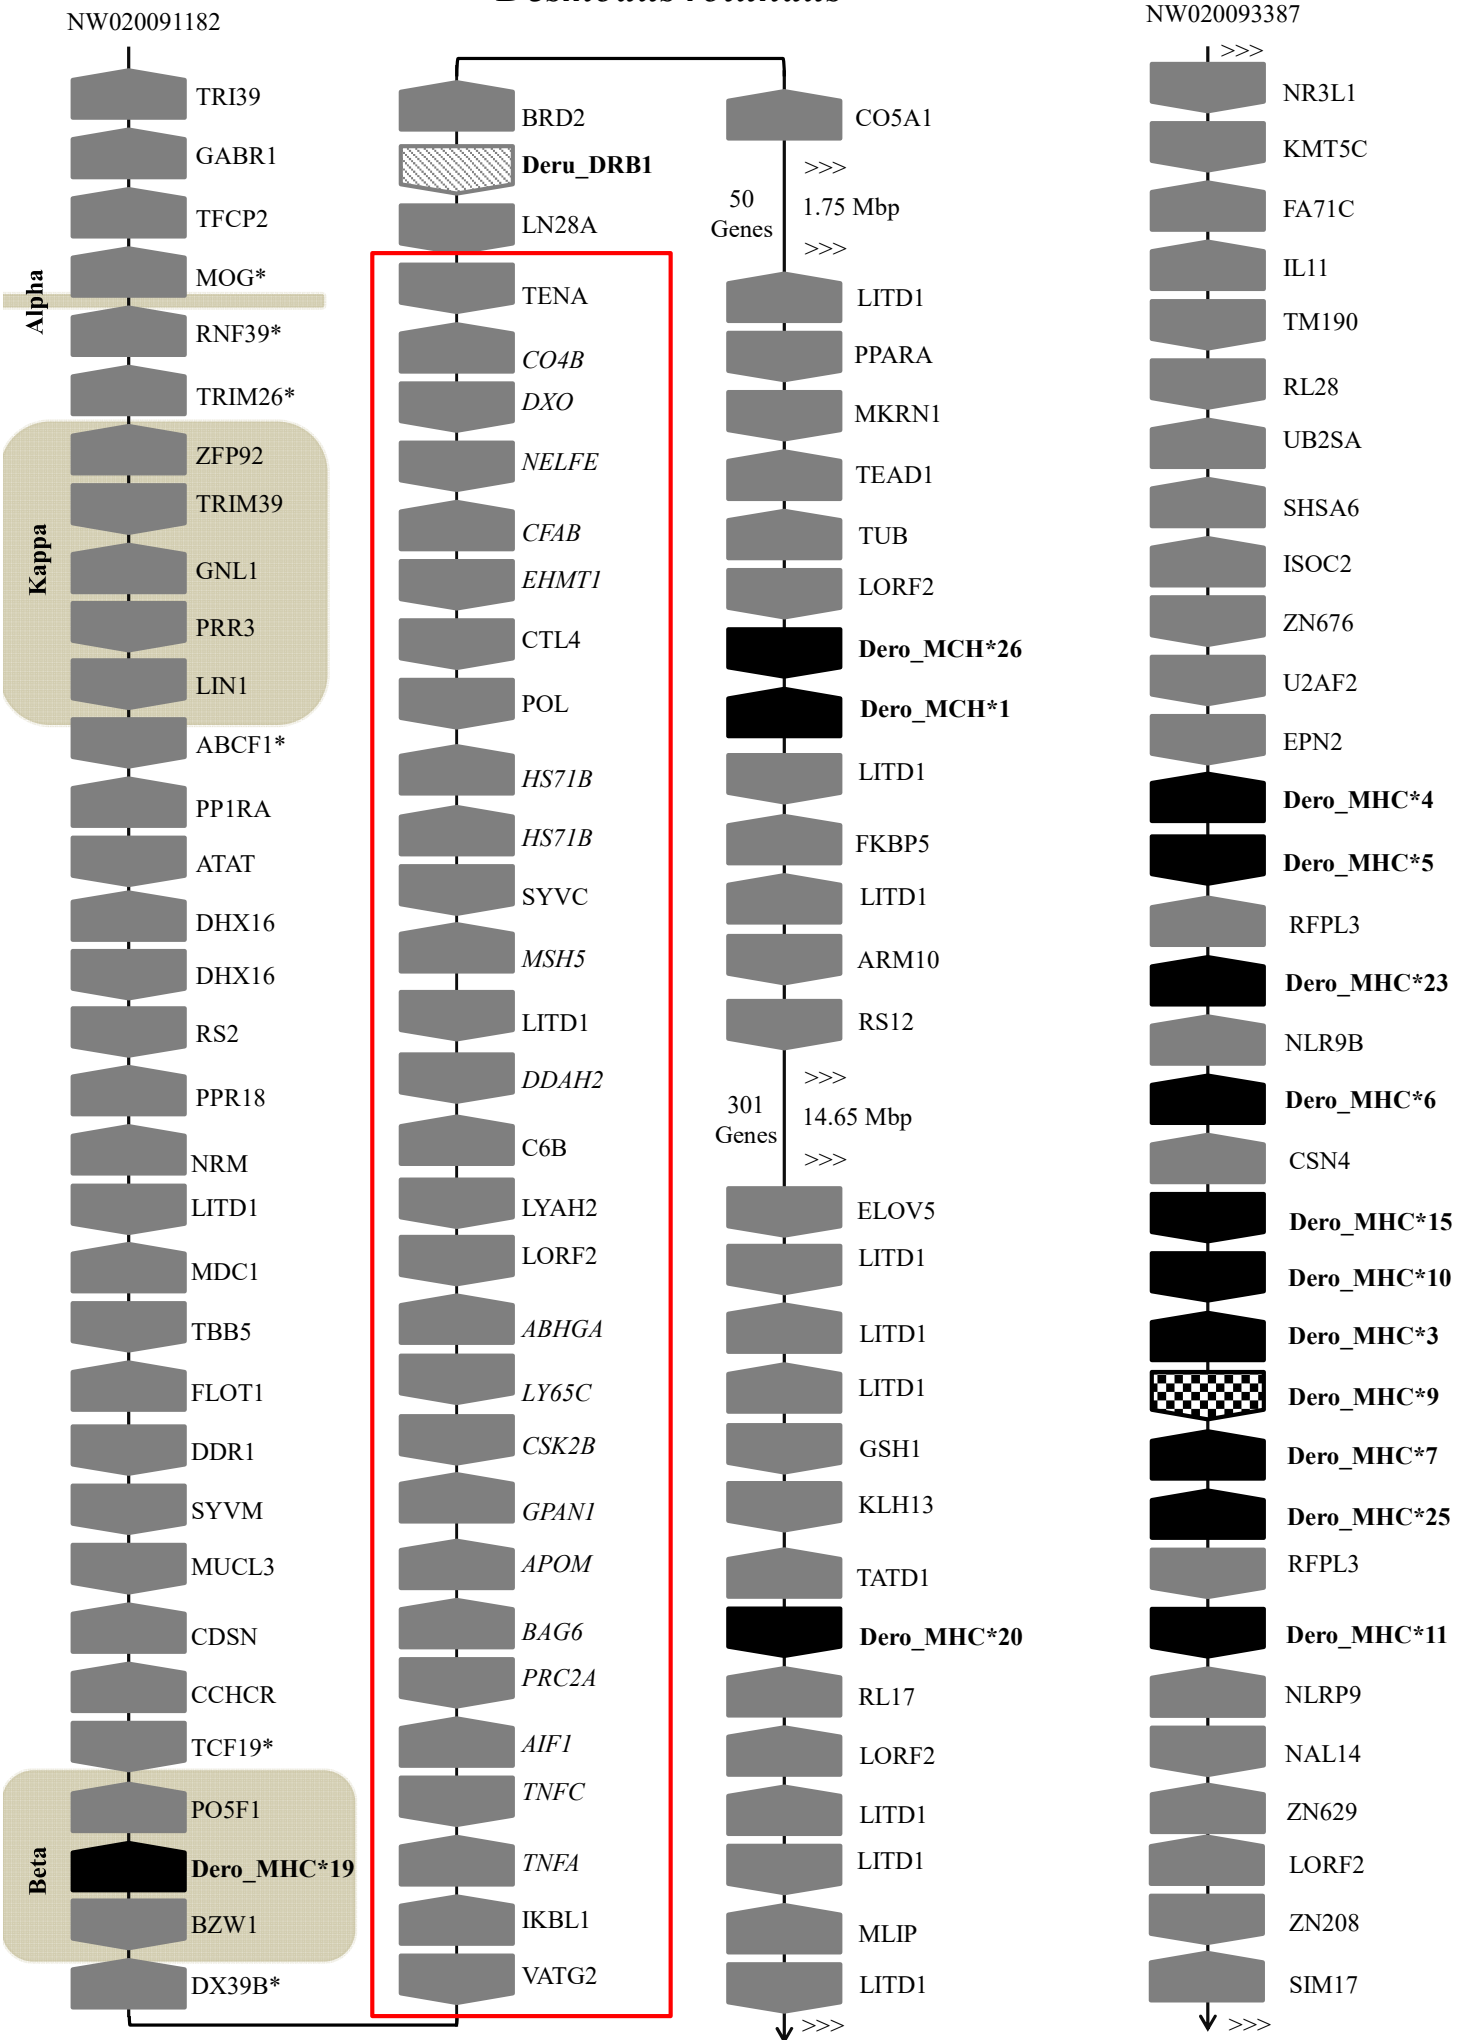



**Supplementary Figure 2 continued**

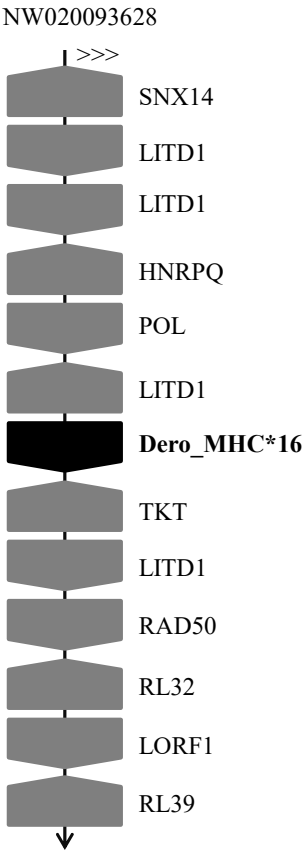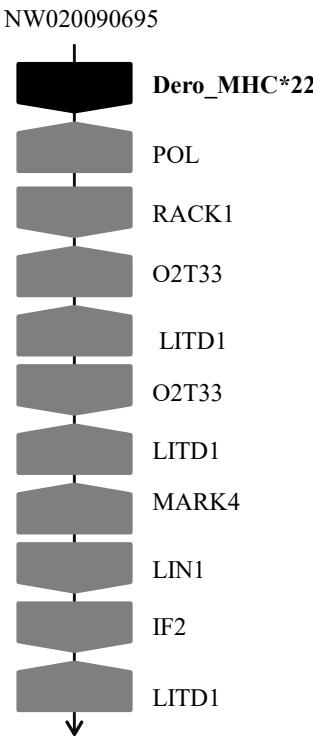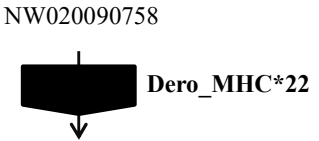

**Supplementary Figure 2.** Genomic map of MHC class I (MHCI) genes for nine species of eutherian mammals. Black boxes indicate putatively functional MHCI genes; gray boxes, non-MHC I genes; heavily stippled boxes, MHC I pseudogenes. The apex of each box indicates the transcriptional direction. The  $\alpha$ ,  $\beta$ , and  $\kappa$  blocks are shaded and labeled. An outline red rectangle indicates the Class III region. The thick, double-headed arrow indicates the extended class I region. The lightly stippled box indicates a class II gene. Accession numbers for scaffolds are at the top for each separate fragment.

*Hipposideros armiger*

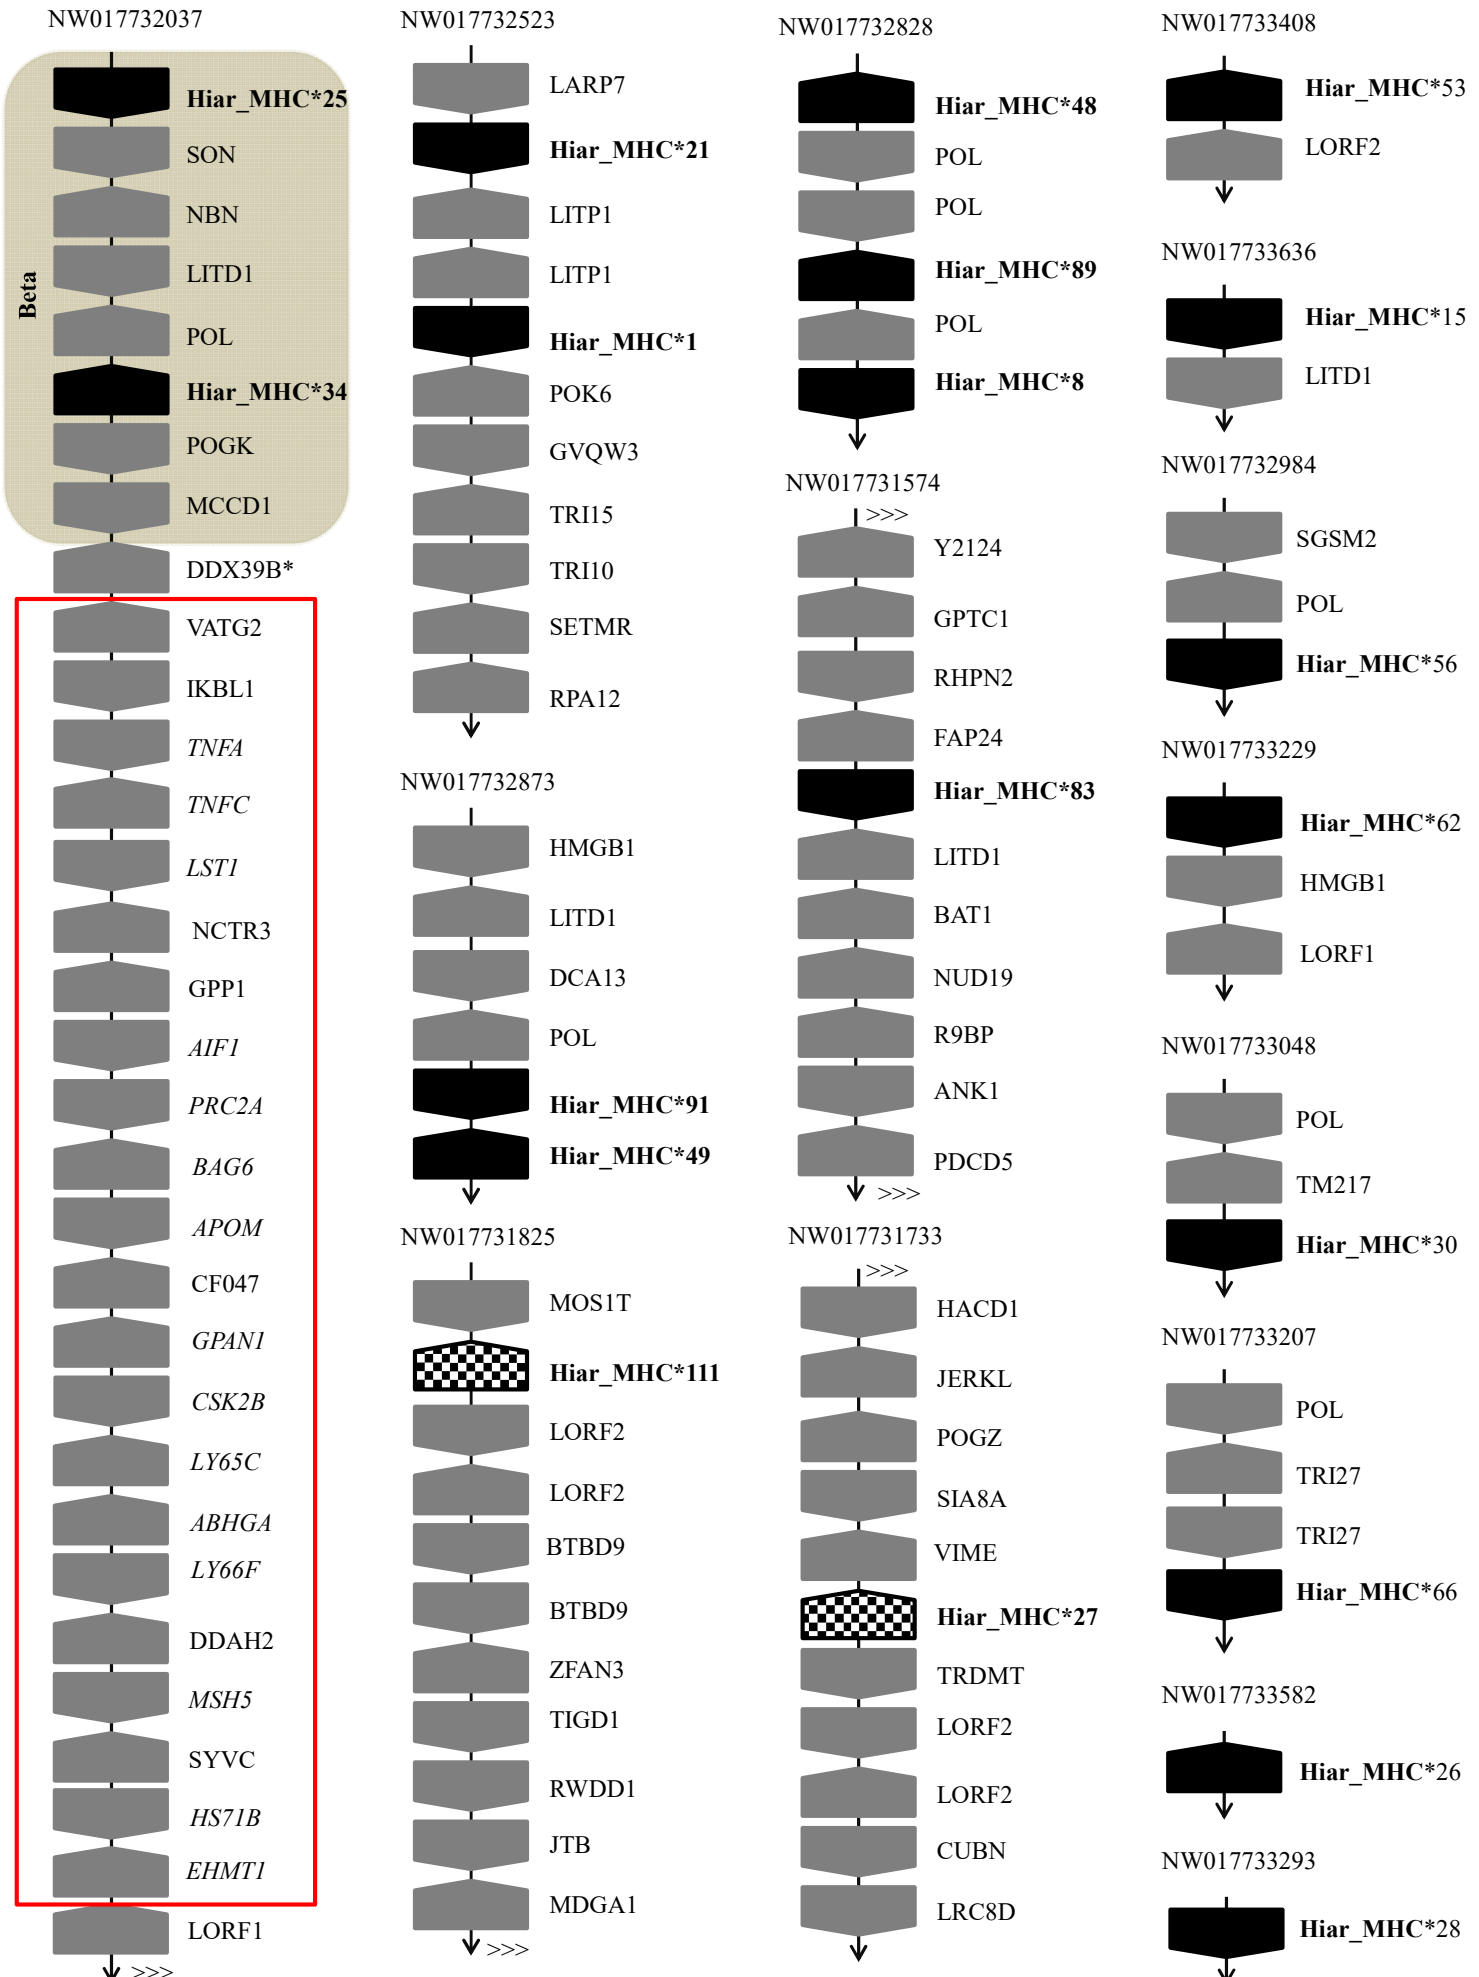

*Miniopterus natalensis*

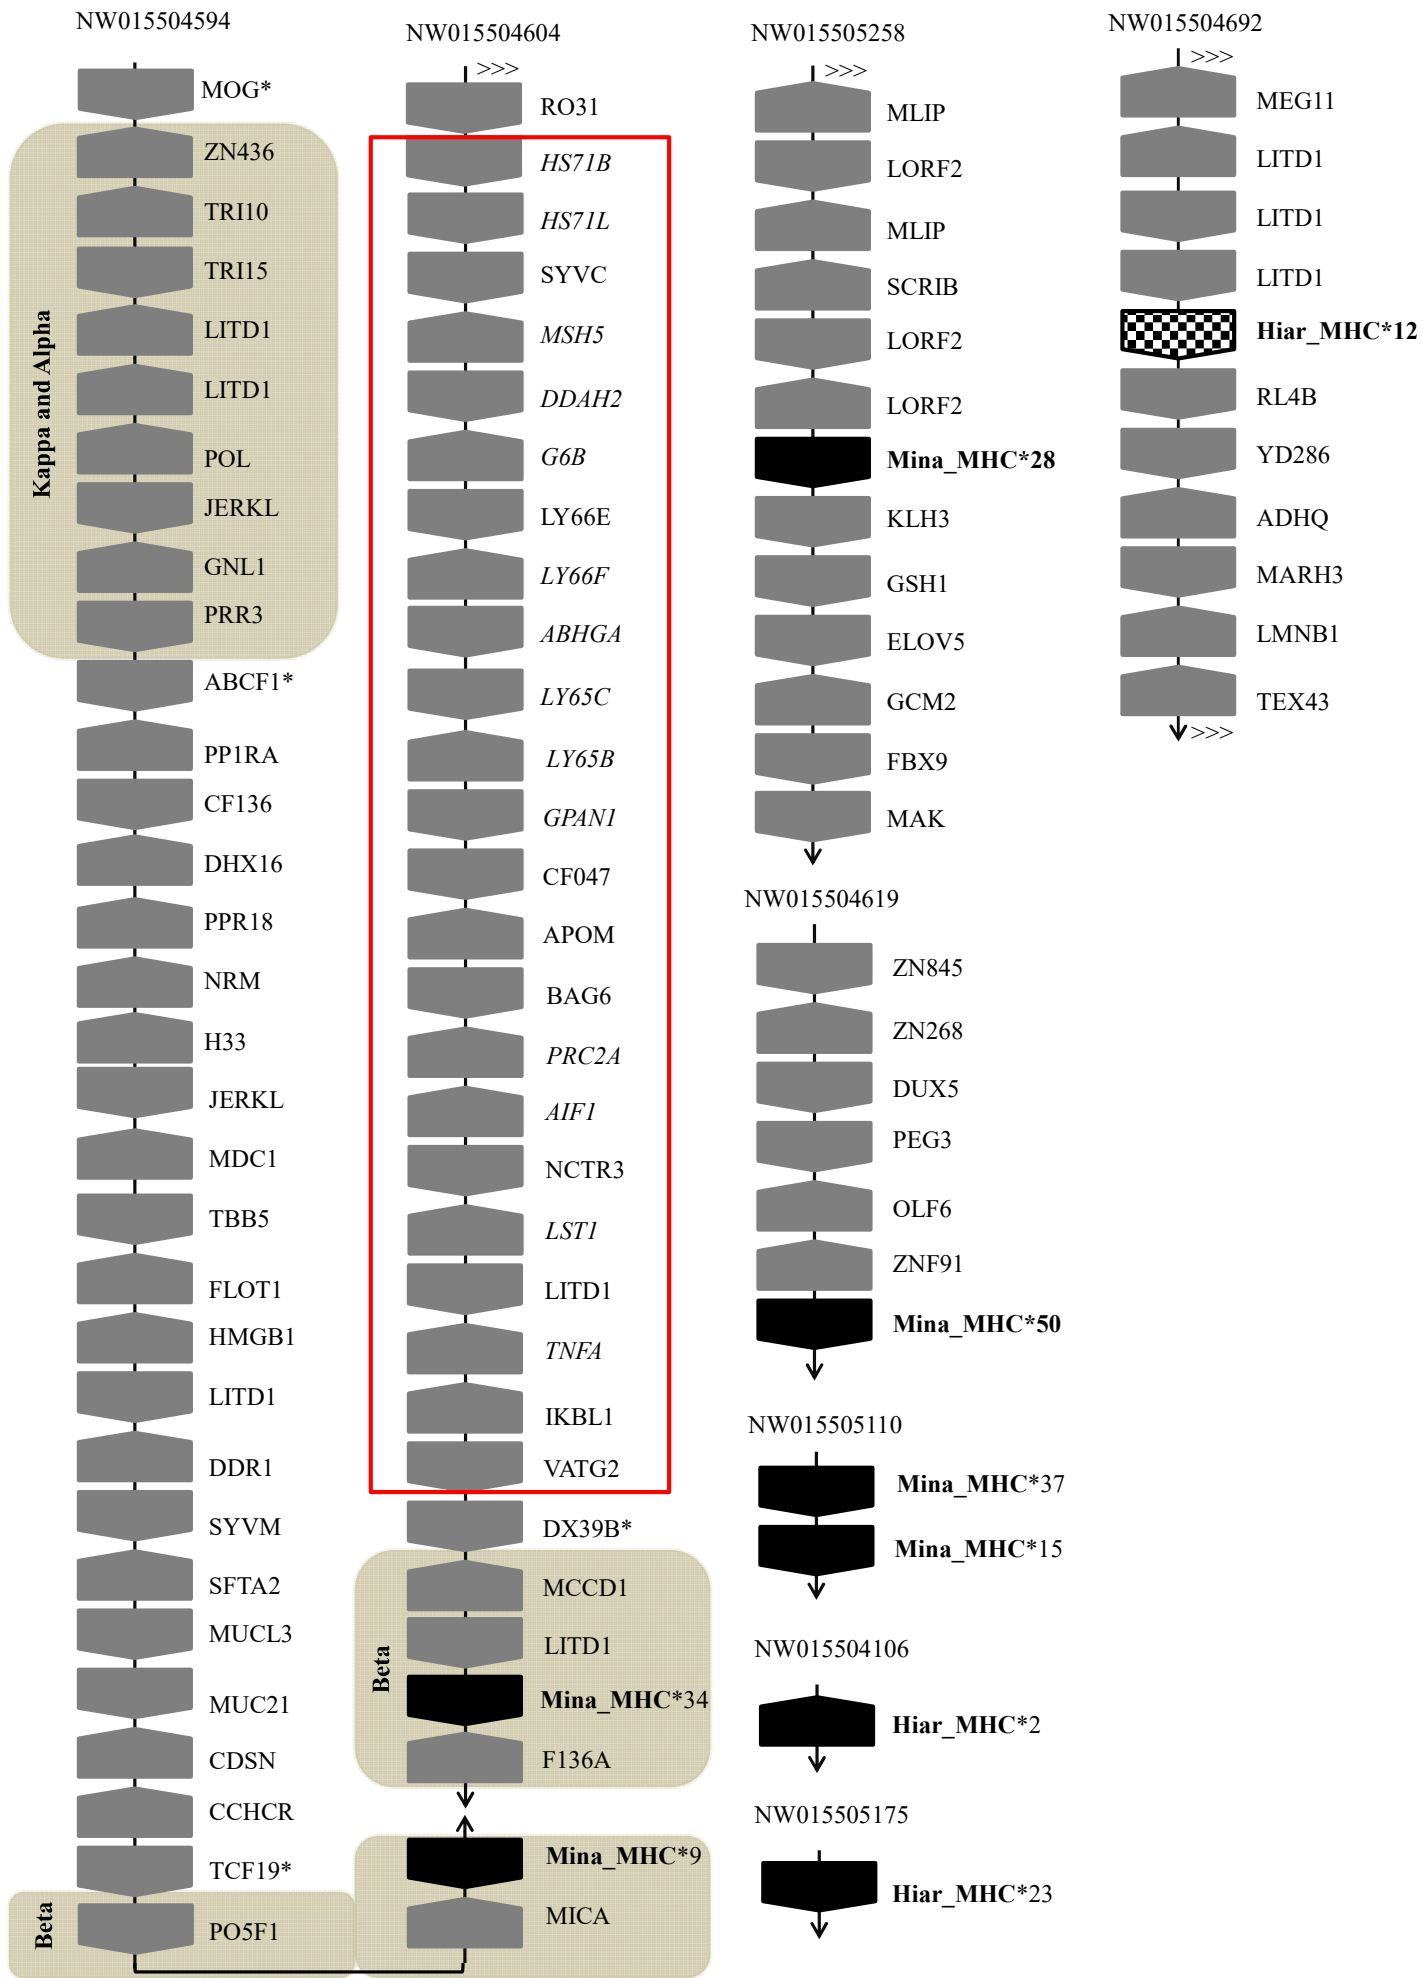

*Rhinolophus sinicus*

NW017739099

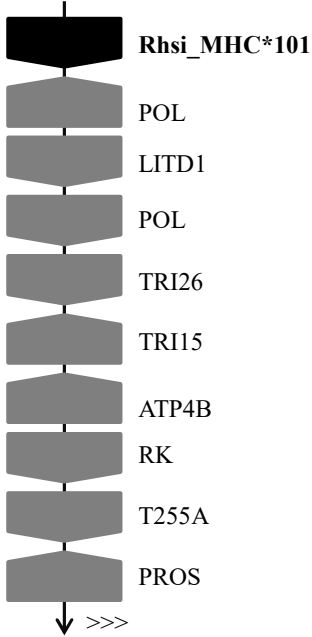

NW017739882

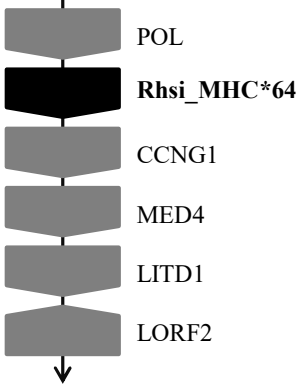

NW017740137

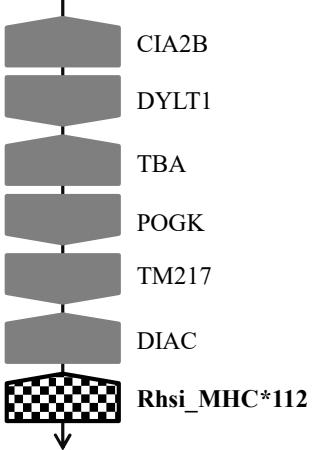

NW017740189

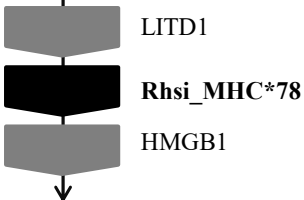

NW017739684

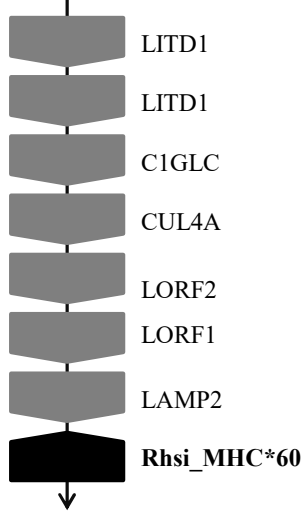

NW017740079

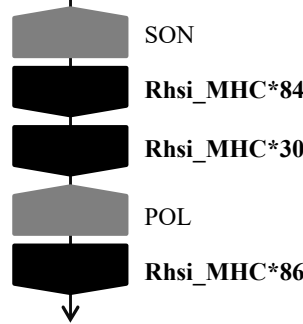

NW017739917

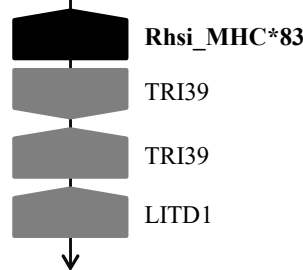

NW017739099

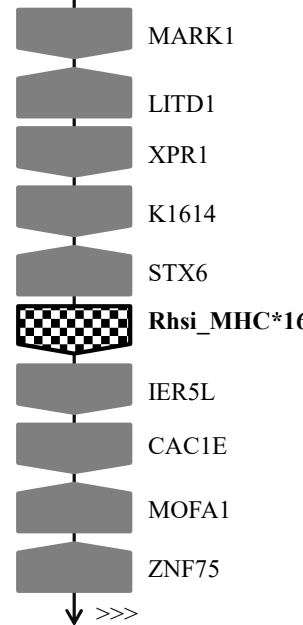

NW017740154

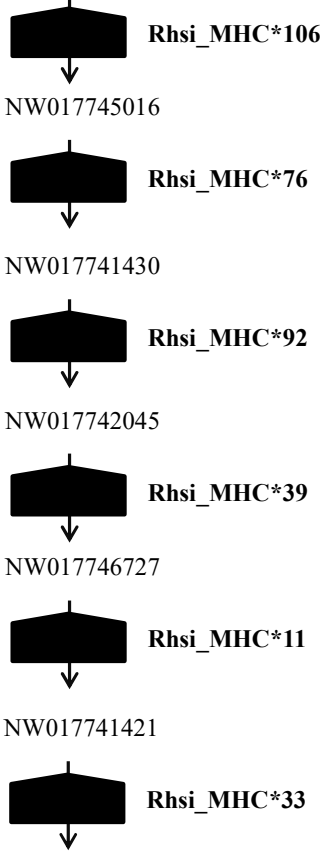

Supplementary Figure 2 continued

*Loxodonta africana*

NW003573542

324.9 Kb

>>>

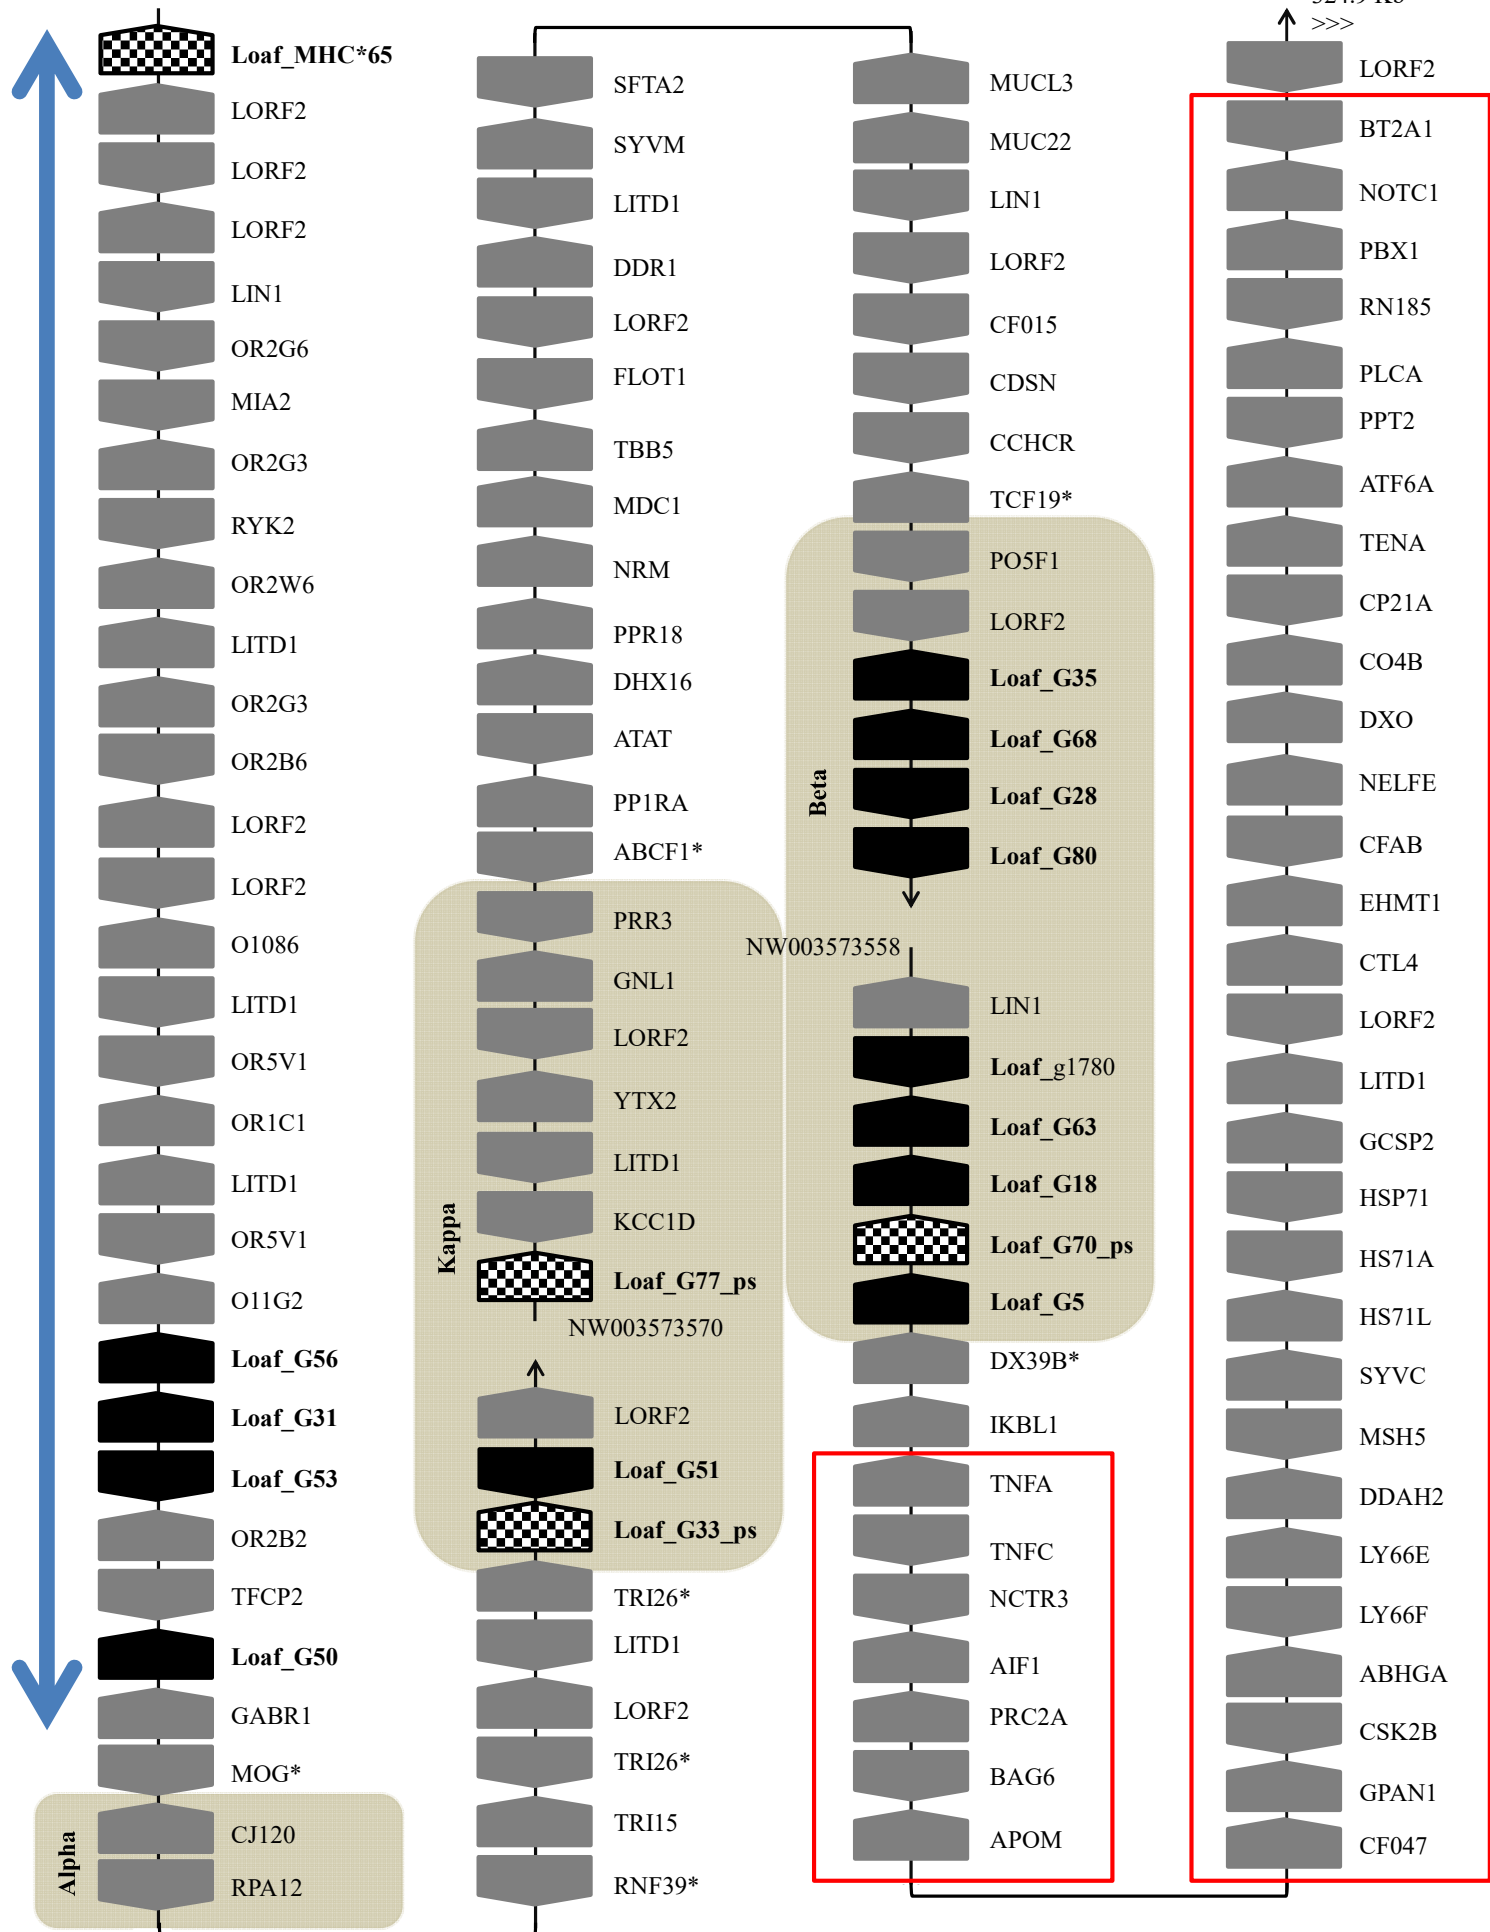

Supplementary Figure 2 continued

NW003573555

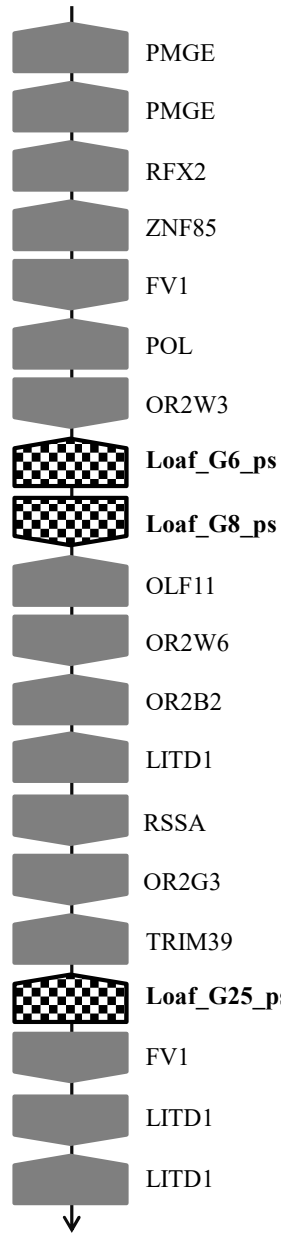

NW003573624

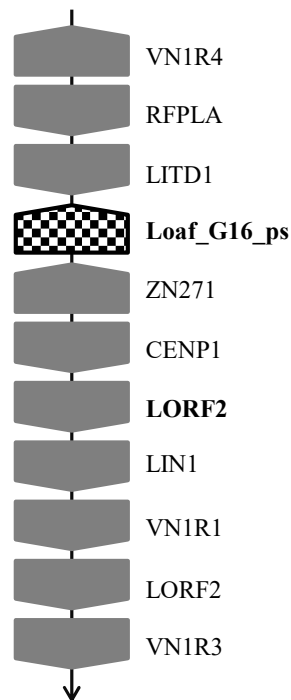

NW003573509

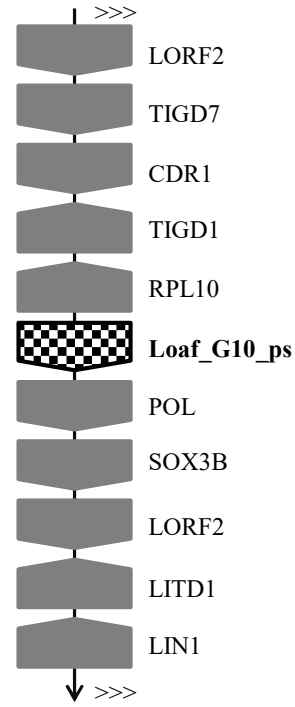

NW003573528

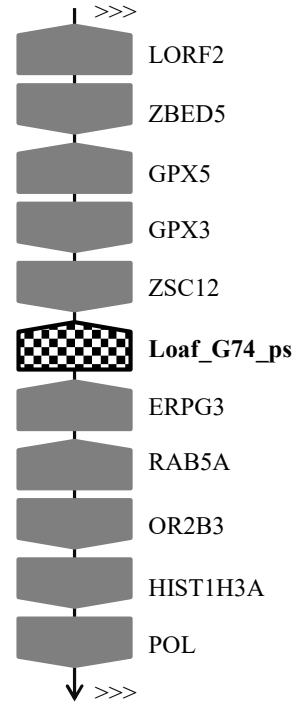

NW003573652

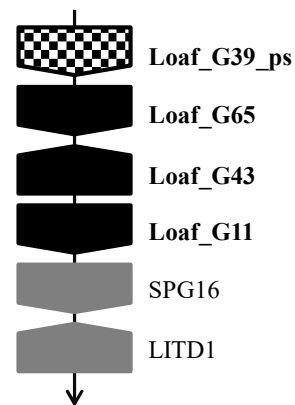

NW003573464

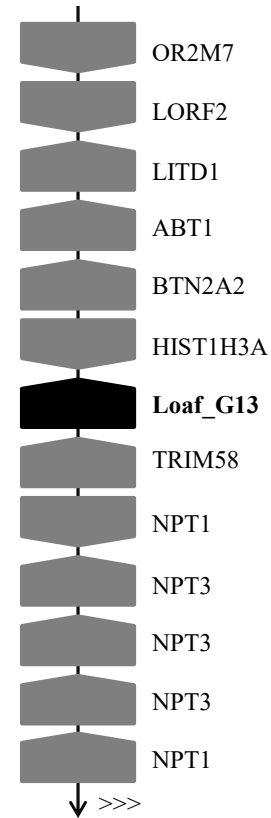

NW003573804

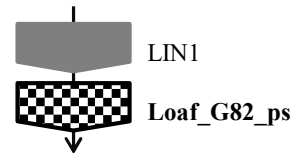

NW003574726

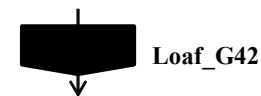

NW003573780

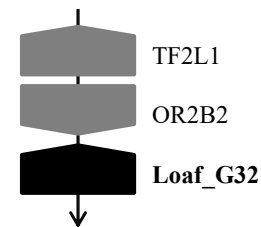

Supplementary Figure 2 continued

*Echinops telfairi*

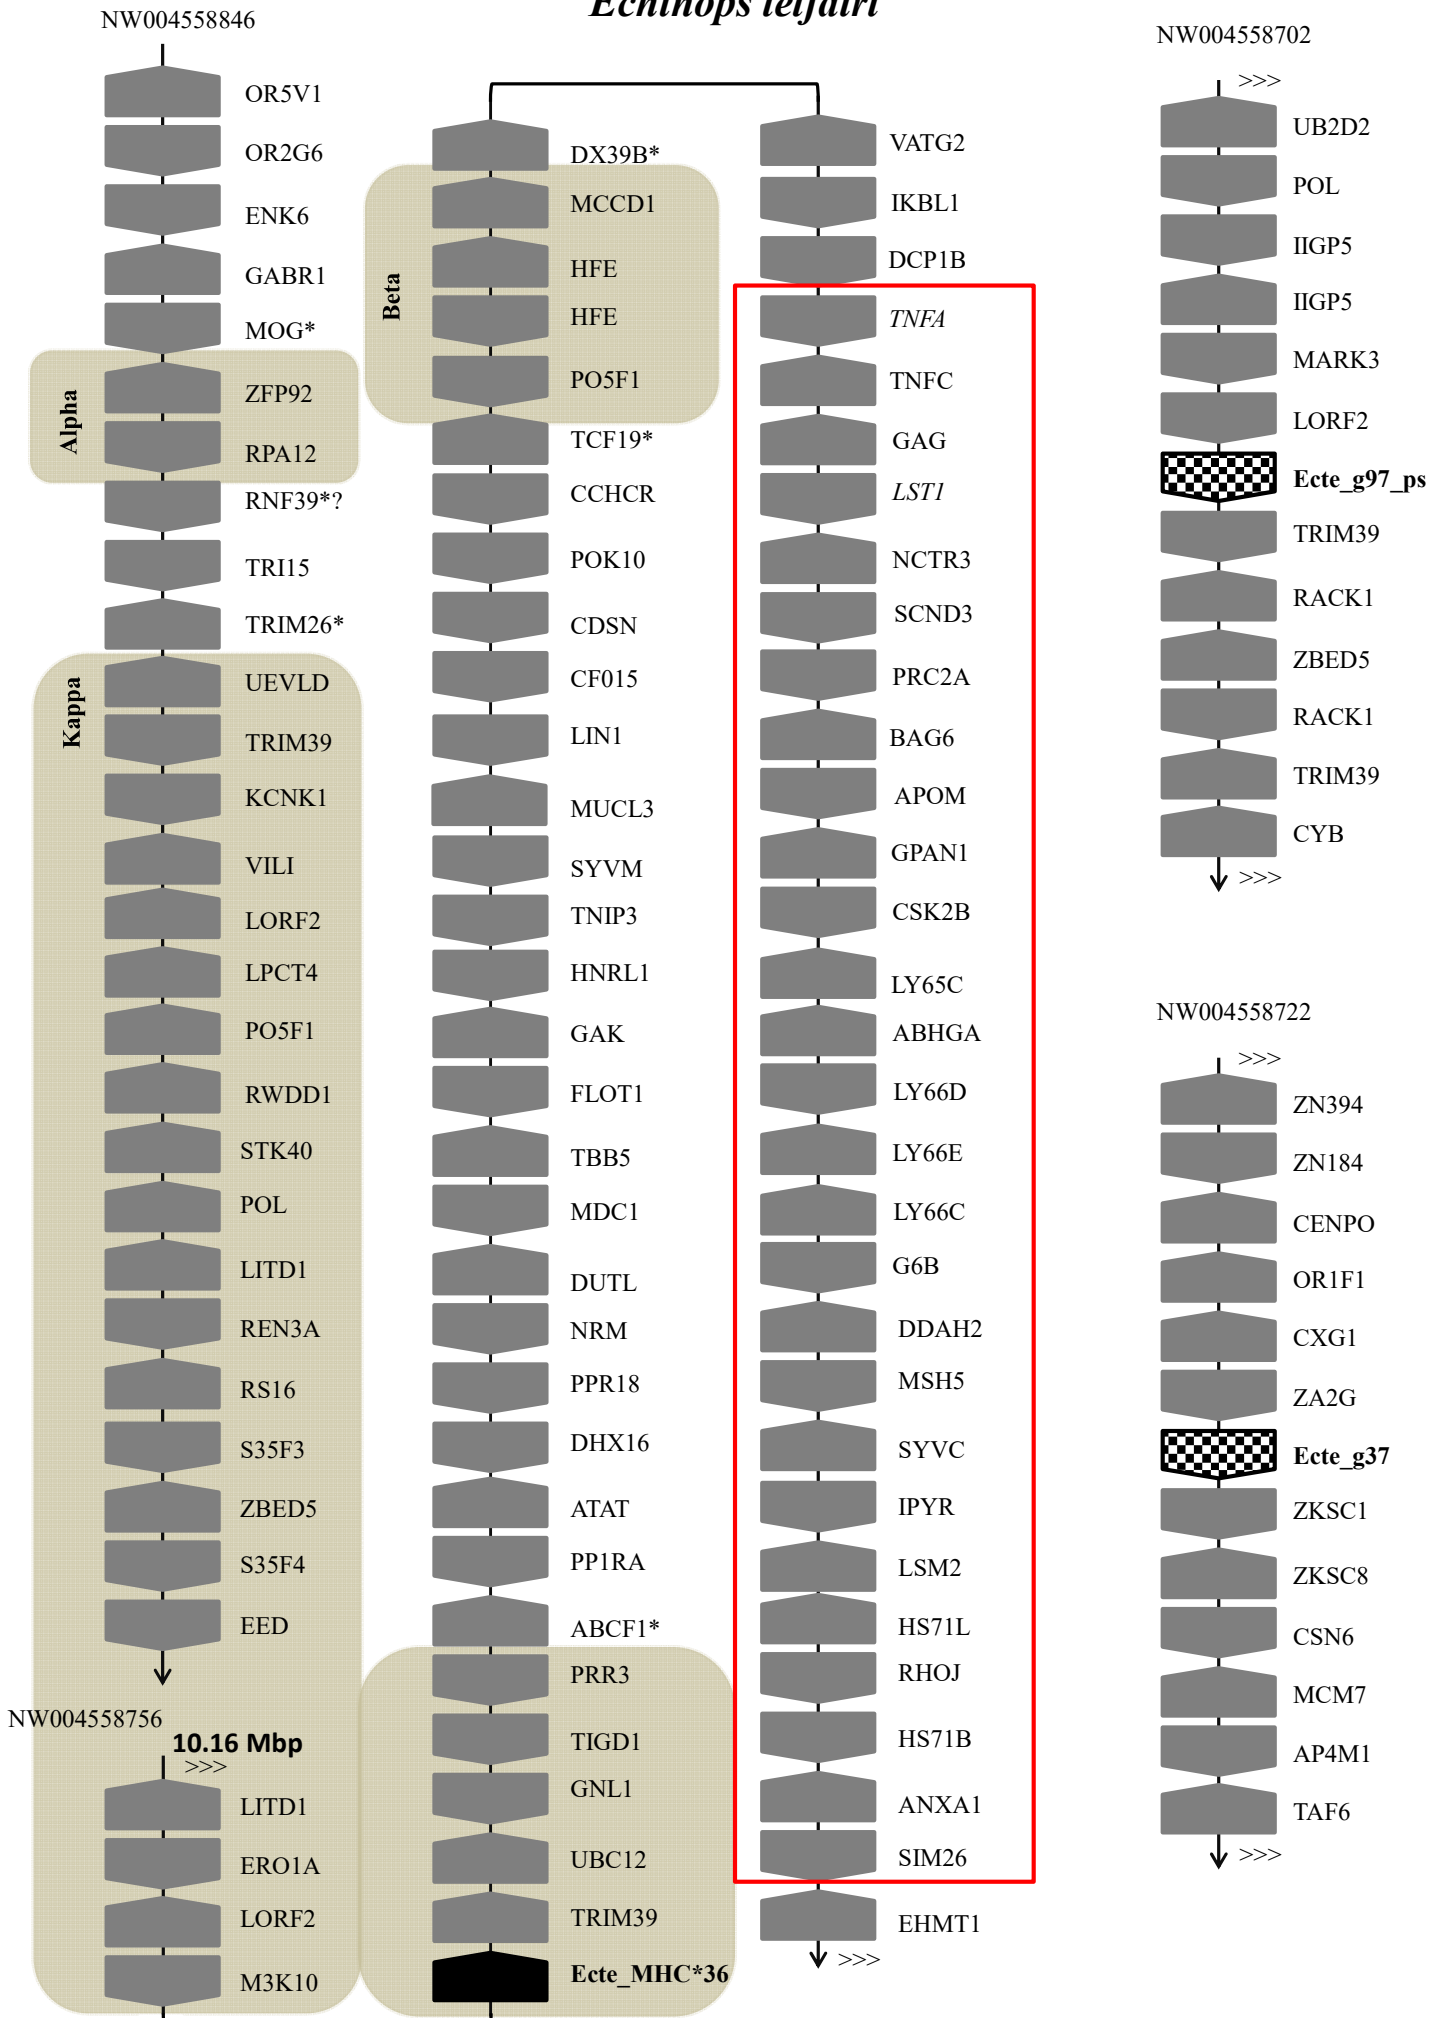

Supplementary Figure 2 continued

NW004558765

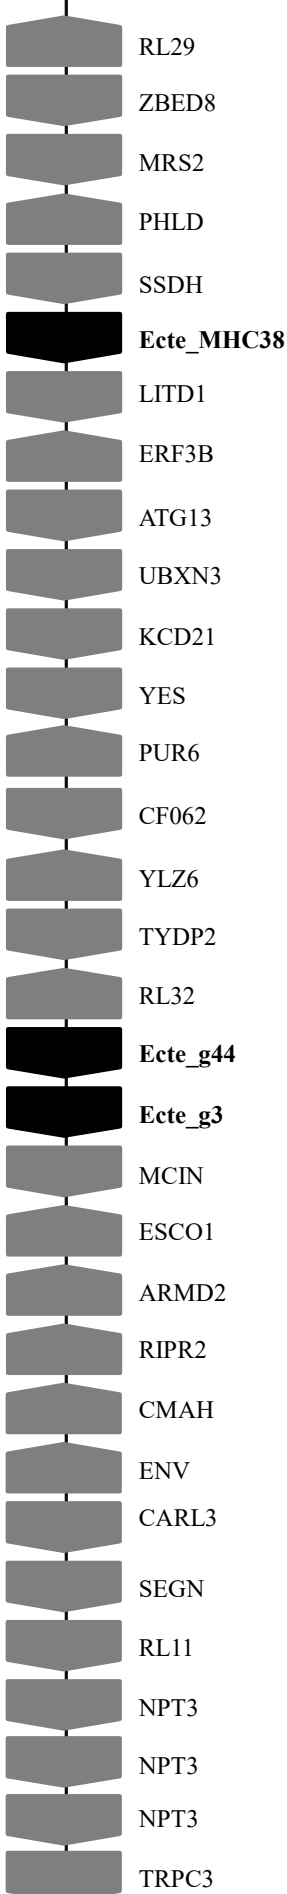

NW004558850

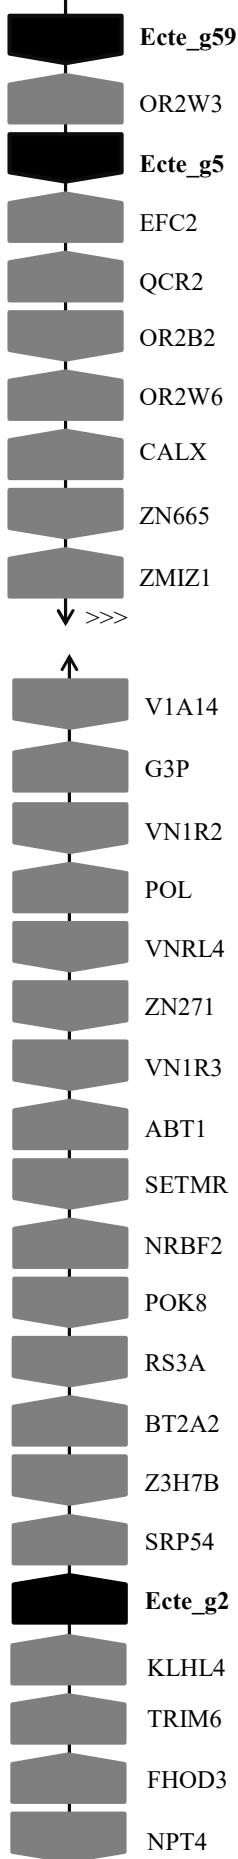

Supplement: ECE3-9-7861-s001.pdf [file ECE3-9-7861-s001.pdf]
